# Supplementary material
Source: publisher figshare collection journal article supplement (https://acs.figshare.com/ndownloader/files/13464833)
Supplement: Supplementary file 1 [file 13464833]

# Supporting Information

## **Mechanisms of Fumonisin B1 Toxicity: A Computational Perspective beyond the Ceramide Synthases Inhibition**

Luca Dellafiora\*, Gianni Galaverna, Chiara Dall'Asta

Department of Food and Drug, University of Parma, Via G.P. Usberti 27/A, 43124 Parma, Italy

\* Corresponding author: Luca Dellafiora, Department of Food and Drug, University of Parma,  
Via G.P. Usberti 17/A, 43124 Parma, Italy

### **Table of Content**

|                                                                                 |           |
|---------------------------------------------------------------------------------|-----------|
| <b>Chemical structures of reference sets (Figure S1) .....</b>                  | <b>S2</b> |
| <b>Assessment of procedural reliability (Figure S2) .....</b>                   | <b>S3</b> |
| <b>Comparison between computed and crystallographic poses (Figure 3S) .....</b> | <b>S4</b> |
| <b>Statistical analysis .....</b>                                               | <b>S4</b> |
| <b>References .....</b>                                                         | <b>S5</b> |

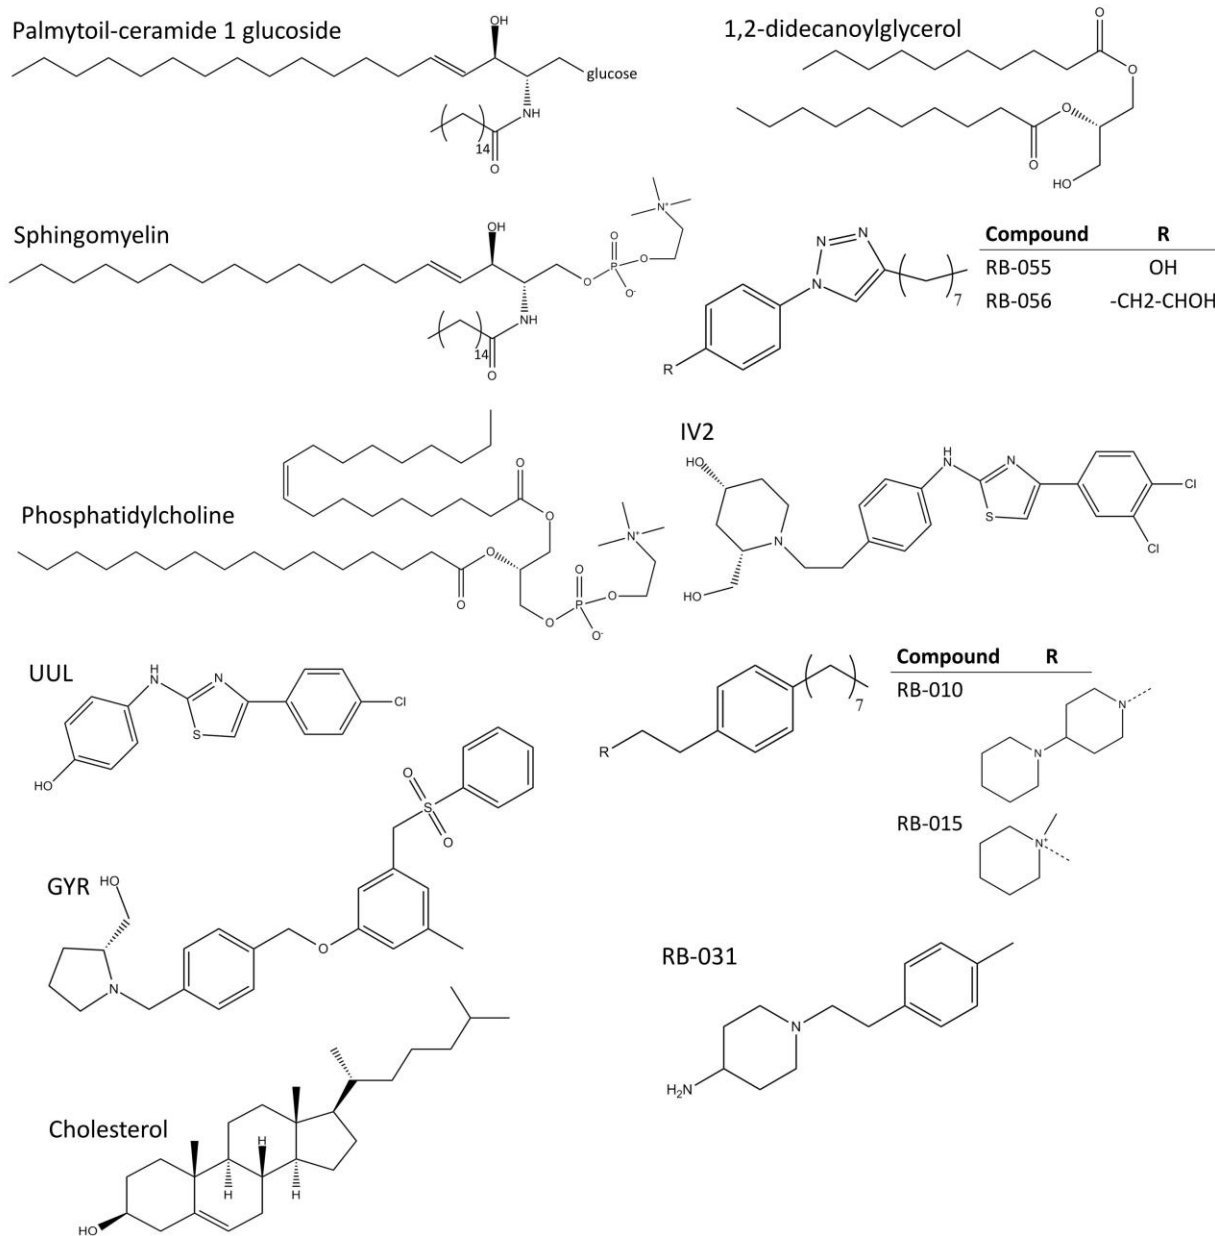

**Figure S1.** Chemical structures of compounds belonging to reference sets

## Assessment of procedural reliability

The procedure proved to be reliable in calculating the interaction of reference compounds with the CERT START domain and SPK1 as: i) reference compounds were significantly categorized in qualitative terms according to the experimental activity reported in the literature (Figure S2); ii) it succeeded in calculating the binding architecture of reference compounds (Figure S3).

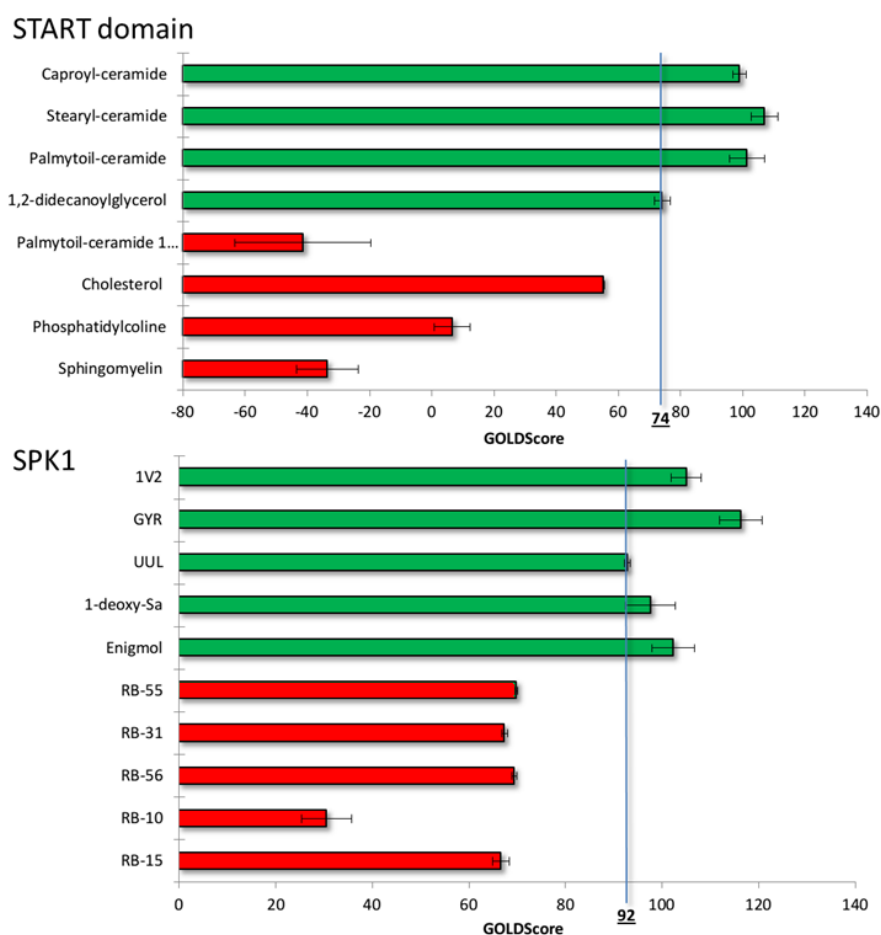

**Figure S2.** Computed scores of reference compounds. START ligands and SPK1 inhibitors are indicated by green bars, while compounds unable to bind START or inhibit SPK1 are indicated in red bars. All the START ligands and SPK1 inhibitors recorded scores significantly different from those of compounds unable to bind START or inhibit SPK1 ( $p < 0.05$ , according to Fisher' LSD *post hoc* test;  $\alpha = 0.05$ ). The lowest score recorded among the known ligands and inhibitors (i.e. 74 and 92 units for START and SPK1, respectively) was set as threshold value to infer the capability of fumonisins and derivatives to positively interact with the models.

### CERT START domain

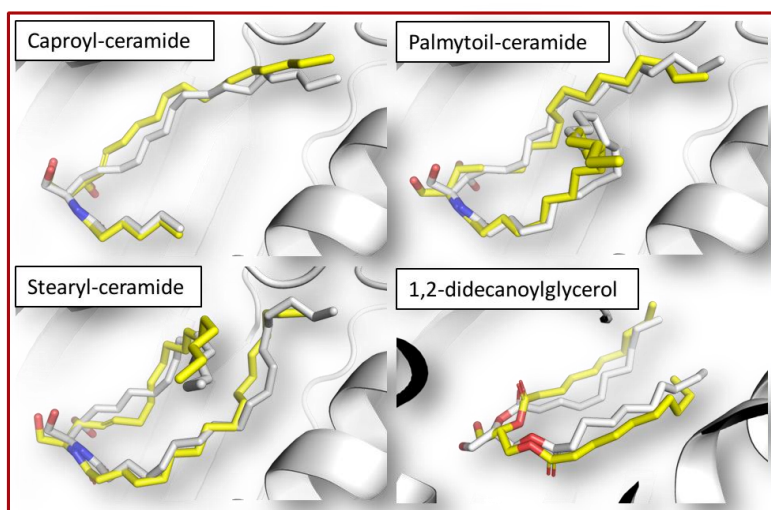

### SPK1

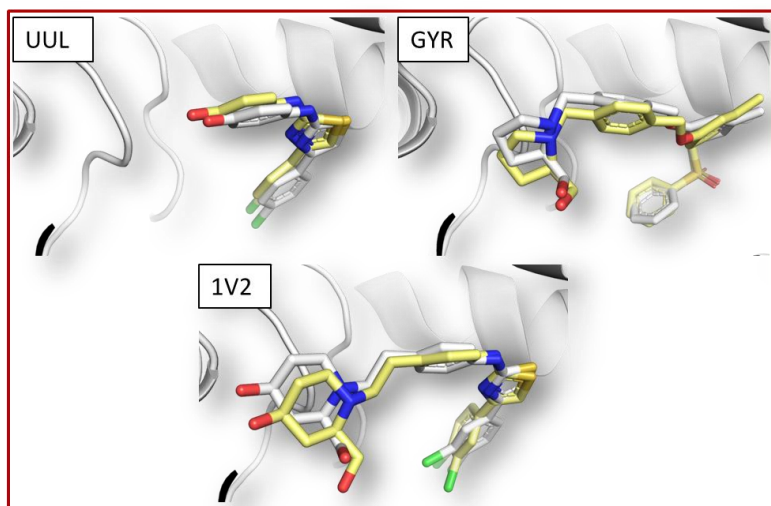

**Figure S3.** Comparison between crystallographic architectures of binding (white) and calculated poses (yellow) of reference compounds within CERT START domain <sup>1</sup> and SPK1 <sup>2-4</sup>.

### Statistical analysis

Each run was performed in triplicate and data are expressed as the mean  $\pm$  standard deviation (SD). Data were statistically compared by one-way ANOVA ( $\alpha = 0.05$ ), using IBM SPSS Statistics for Windows, version 23 (IBM Corp., Armonk, NY).

## References

- (1) Kudo, N., Kumagai, K., Tomishige, N., Yamaji, T., Wakatsuki, S., Nishijima, M., Hanada, K., and Kato, R. (2008) Structural basis for specific lipid recognition by CERT responsible for nonvesicular trafficking of ceramide. *Proc. Natl. Acad. Sci. U S A* 105, 488-493.
- (2) Gustin, D. J., Li, Y., Brown, M. L., Min, X., Schmitt, M. J., Wanska, M., Wang, X., Connors, R., Johnstone, S., Cardozo, M., Cheng, A. C., Jeffries, S., Franks, B., Li, S., Shen, S., Wong, M., Wesche, H., Xu, G., Carlson, T. J., Plant, M., Morgenstern, K., Rex, K., Schmitt, J., Coxon, A., Walker, N., Kayser, F., and Wang, Z. (2013) Structure guided design of a series of sphingosine kinase (SphK) inhibitors. *Bioorg. Med. Chem. Lett.* 23, 4608-4616.
- (3) Wang, Z., Min, X., Xiao, S. H., Johnstone, S., Romanow, W., Meininger, D., Xu, H., Liu, J., Dai, J., An, S., Thibault, S., and Walker, N. (2013) Molecular basis of sphingosine kinase 1 substrate recognition and catalysis. *Structure* 21, 798-809.
- (4) Wang, J., Knapp, S., Pyne, N. J., Pyne, S., and Elkins, J. M. (2014) Crystal Structure of Sphingosine Kinase 1 with PF-543. *ACS Med. Chem. Lett.* 5, 1329-1333.
